# Supplementary material for: Age Associated Microbiome and Microbial Metabolites Modulation and Its Association With Systemic Inflammation in a Rhesus Macaque Model
Source: PubMed Central journal article supplement (PMC8560971; doi:10.3389/fimmu.2021.748397), 2021-10-19
Supplement: Table_1.pdf [file Table_1.pdf]

| <b>Supplement Table 1: Characteristics of the animals used in the study</b> |                  |                  |                           |               |                |                                           |                         |                                                   |                             |                                  |                              |                      |
|-----------------------------------------------------------------------------|------------------|------------------|---------------------------|---------------|----------------|-------------------------------------------|-------------------------|---------------------------------------------------|-----------------------------|----------------------------------|------------------------------|----------------------|
| <b>Animal ID</b>                                                            | <b>Age Group</b> | <b>Birthdate</b> | <b>Age at Study Entry</b> | <b>Gender</b> | <b>Housing</b> | <b>Relatedness</b>                        | <b>Date of sampling</b> | <b>Body weights at the time of sampling (kgs)</b> | <b>Body condition score</b> | <b>Last antibiotic treatment</b> | <b>Last NSAIDs treatment</b> | <b>Health status</b> |
| 93N173                                                                      | Old              | 6/20/1993        | 24                        | Male          | single         | cousin to 95N063, uncle to 97X005, 93N056 | 7/17/2017               | 10.65                                             | 4.5                         | N/A                              | 27-Apr-14                    | obese                |
| 95N063                                                                      | Old              | 5/7/1995         | 22                        | Female        | single         | cousin to 93N173, 93N056                  | 7/17/2017               | 6.75                                              | N/A                         | 10-Jan-08                        | N/A                          | healthy              |
| 97X005                                                                      | Old              | 4/19/1997        | 20                        | Female        | single         | nephew to 93N173, cousin to 98X015        | 7/17/2017               | 6.95                                              | 3                           | 7-Feb-11                         | 4-Mar-16                     | healthy              |
| 98X015                                                                      | Old              | 7/10/1998        | 19                        | Female        | single         | cousin to 97X005                          | 7/17/2017               | 10.6                                              | 5                           | 3-May-04                         | 14-Feb-15                    | obese                |
| 93N056                                                                      | Old              | 4/27/1993        | 24                        | Female        | single         | nephew to 93N173, cousin to 95N063        | 7/19/2017               | 8.40                                              | N/A                         | 14-May-03                        | N/A                          | healthy              |
| 94N215                                                                      | Old              | 11/12/1994       | 23                        | Female        | single         |                                           | 7/19/2017               | 9.25                                              | N/A                         | 9-Mar-16                         | 1-May-12                     | healthy              |
| 97-R001                                                                     | Old              | 1/1/1994         | 23                        | Female        | single         |                                           | 7/19/2017               | 5.35                                              | 2.5                         | 12-Mar-13                        | 21-Aug-16                    | healthy              |
| RUB6                                                                        | Old              | 4/23/1997        | 20                        | Female        | single         | dam to A13T020                            | 7/19/2017               | 7.30                                              | 3.5                         | N/A                              | N/A                          | healthy              |
| A13T016                                                                     | Young            | 6/5/2013         | 4                         | Male          | single         | nephew to A14T007                         | 7/19/2017               | 5.35                                              | 2.5                         | N/A                              | N/A                          | healthy              |
| A13T020                                                                     | Young            | 6/23/2013        | 4                         | Male          | single         | offspring of RUB6                         | 7/19/2017               | 5.55                                              | 2.5                         | 17-Mar-14                        | N/A                          | healthy              |
| A13T022                                                                     | Young            | 7/20/2013        | 4                         | Male          | single         |                                           | 7/19/2017               | 4.95                                              | 2.5                         | N/A                              | N/A                          | healthy              |
| A14T007                                                                     | Young            | 5/27/2014        | 3                         | Male          | single         | uncle of A13T016                          | 7/19/2017               | 4.80                                              | 2.5                         | N/A                              | N/A                          | healthy              |
