# Supplementary material for: Age Associated Microbiome and Microbial Metabolites Modulation and Its Association With Systemic Inflammation in a Rhesus Macaque Model
Source: PubMed Central journal article supplement (PMC8560971; doi:10.3389/fimmu.2021.748397), 2021-10-19
Supplement: Table_2.pdf [file Table_2.pdf]

| Present in Young adults, Absent in Geriatric            | Mean (young) AUC | SD       | P-value (Benjamini-Hochberg corrected) |
|---------------------------------------------------------|------------------|----------|----------------------------------------|
| L-Methionine                                            | 3.30E+15         | 1.80E+13 | 0.00139999                             |
| 4-aminobutanal                                          | 1.88E+16         | 3.60E+05 | 0.02732292                             |
| paspalicine                                             | 1.47E+15         | 4.71E+09 | 2.5888E-09                             |
| Dimethyl trisulfide                                     | 2.11E+08         | 9.70E+03 | 0.02732789                             |
| (S)-Ureidoglycolate                                     | 3.16E+13         | 9.98E+09 | 0.02733064                             |
| enol-oxaloacetate                                       | 1.96E+16         | 3.88E+07 | 0.02733975                             |
| phenylphosphonate                                       | 1.00E+16         | 2.23E+06 | 0.02734137                             |
| Crotanecine                                             | 8.88E+12         | 1.12E+04 | 0.02735396                             |
| Proxan                                                  | 1.22E+16         | 2.70E+05 | 0.02736192                             |
| Dimethylsulfonioacetate                                 | 9.90E+11         | 7.50E+06 | 0.02736272                             |
| N-(Acetyloxy)benzenamine                                | 2.70E+14         | 3.50E+09 | 0.02737433                             |
| 2-Methylthiobenzothiazole                               | 6.83E+15         | 2.80E+05 | 0.0274043                              |
| N-Methylethanolamine phosphate                          | 2.09E+10         | 1.10E+05 | 0.02743136                             |
| L-Phenylalanine                                         | 8.99E+16         | 1.12E+10 | 0.02744797                             |
| Sodium fluoroacetate                                    | 1.19E+12         | 9.91E+04 | 0.02745065                             |
| 3-(2-Hydroxyphenyl)propanoate                           | 2.20E+09         | 8.60E+03 | 0.02745716                             |
| Benzyl thiocyanate                                      | 2.55E+14         | 1.19E+11 | 0.02753093                             |
| 2-Chloro-4-hydroxy-6-amino-1,3,5-triazine               | 1.43E+13         | 9.80E+12 | 0.02754867                             |
| 2,3-Dimethylmaleate                                     | 5.71E+14         | 2.38E+12 | 0.0281087                              |
| 3-Methyl-2-oxobutanoic acid                             | 6.02E+14         | 8.77E+04 | 0.02813047                             |
| (2Z)-2-amino-3-hydroxy-3-(4-hydroxyphenyl)prop-2-enoate | 7.45E+15         | 1.11E+11 | 0.028274                               |
| 2-Aminobenzenesulfonate                                 | 3.30E+15         | 2.01E+13 | 0.02827475                             |
| 4-chlorocatechol                                        | 1.82E+16         | 9.99E+09 | 0.02843428                             |
| Phosphotyrosine                                         | 7.10E+15         | 7.20E+11 | 0.02848907                             |
| Diphenidol                                              | 9.00E+15         | 7.27E+11 | 0.02857142                             |
| (S)-Malate                                              | 8.88E+13         | 2.29E+08 | 0.02858907                             |
| Sodium diethyldithiocarbamate                           | 1.96E+15         | 9.22E+12 | 0.02971486                             |
| 2-Pyridyl hydroxymethane sulfonic acid                  | 2.04E+16         | 4.77E+13 | 0.03040367                             |
| Thiomorpholine 3-carboxylate                            | 1.81E+17         | 1.77E+12 | 0.03084678                             |
| Bronopol                                                | 6.08E+15         | 6.43E+11 | 0.03140168                             |
| Benzyl alcohol                                          | 1.12E+15         | 8.73E+10 | 0.03303162                             |
| acivicin                                                | 4.01E+17         | 1.15E+09 | 0.03321789                             |
| 4-amino-3-methoxybenzoate                               | 3.54E+16         | 1.21E+14 | 0.04084084                             |
| 4-Hydroxy-2-butyral                                     | 3.01E+15         | 3.32E+12 | 0.04803409                             |
| Sulfate                                                 | 7.91E+15         | 6.31E+12 | 0.01096798                             |
| 4-fluoroglutamate                                       | 8.72E+13         | 1.54E+11 | 0.0273234                              |
| 4-Bromophenol                                           | 7.99E+13         | 8.77E+08 | 0.02733405                             |
| Cyclic 2,3-bisphospho-D-glycerate                       | 1.30E+13         | 9.97E+09 | 0.02734942                             |
| GA                                                      | 1.19E+16         | 1.22E+11 | 0.02735024                             |
| Phenelzine sulfate                                      | 5.12E+12         | 7.75E+07 | 0.02741934                             |
| 5-Hydroxyindoleacetyl glycine                           | 9.46E+15         | 2.75E+11 | 0.02758884                             |
| brassicicene E                                          | 1.60E+13         | 3.34E+11 | 0.02759978                             |

|                                   |          |          |            |
|-----------------------------------|----------|----------|------------|
| Hexadecanoic acid                 | 8.17E+14 | 3.34E+12 | 0.02762509 |
| Sethoxydim                        | 2.44E+16 | 2.14E+10 | 0.02809963 |
| Cyclic 2,3-bisphospho-D-glycerate | 1.81E+14 | 4.43E+10 | 0.02987916 |
| Esprocarb                         | 7.78E+14 | 9.88E+12 | 0.04034487 |
| Sulfate                           | 8.22E+12 | 2.94E+10 | 0.04179767 |
| 3,4-Dichloroaniline               | 8.23E+15 | 7.75E+09 | 0.04191133 |
| Sethoxydim                        | 5.29E+14 | 4.47E+12 | 0.04255662 |
| Phenelzine sulfate                | 2.41E+13 | 2.12E+11 | 0.04496404 |
| 5-Hydroxyindoleacetyl glycine     | 2.00E+13 | 3.13E+10 | 0.04879065 |
| Ergonovine                        | 6.43E+14 | 8.84E+12 | 0.04946701 |

| Down-regulated in Geriatric                                | Mean (young) AUC | SD (young) | Mean (old) AUC | SD (old) | P-value (Benjamini-Hochberg corrected) |
|------------------------------------------------------------|------------------|------------|----------------|----------|----------------------------------------|
| 2'-aminobiphenyl-2,3-diol                                  | 3.16E+15         | 8.82E+10   | 2.25E+04       | 7.00E+02 | 0.00431054                             |
| 2-Hydroxypyridine                                          | 3.66E+14         | 1.87E+12   | 7.22E+10       | 2.79E+05 | 0.0003155                              |
| 2,3,5-Trihydroxytoluene                                    | 2.88E+16         | 1.01E+13   | 5.39E+09       | 1.59E+07 | 0.00112588                             |
| Maleamate                                                  | 7.69E+16         | 1.12E+15   | 4.22E+08       | 2.25E+06 | 0.04047555                             |
| DL-norvaline                                               | 2.61E+16         | 8.97E+13   | 5.12E+09       | 4.10E+07 | 0.04561044                             |
| L-Selenocysteine                                           | 4.07E+15         | 2.66E+12   | 8.51E+11       | 2.11E+08 | 0.0433131                              |
| Retinoate                                                  | 1.18E+16         | 1.19E+09   | 7.55E+05       | 9.00E+03 | 0.04065873                             |
| Halacrinat                                                 | 2.99E+13         | 5.54E+11   | 6.64E+08       | 1.21E+06 | 0.04231169                             |
| (9Z)-Octadecenoic acid                                     | 1.97E+15         | 1.12E+14   | 2.97E+13       | 4.54E+10 | 0.04881578                             |
| 5-Hydroxyindoleacetyl glycine                              | 1.68E+15         | 9.92E+13   | 8.77E+09       | 1.01E+09 | 0.00701656                             |
| Cyclic 2,3-bisphospho-D-glycerate                          | 4.06E+14         | 2.27E+13   | 5.54E+12       | 1.66E+12 | 0.04134309                             |
| glorin                                                     | 3.56E+13         | 9.77E+12   | 1.59E+10       | 2.58E+09 | 0.04465609                             |
| N-Methylindolo[3,2-b]-5alpha-cholest-2-ene                 | 1.49E+14         | 7.99E+12   | 8.89E+09       | 3.94E+08 | 0.02359062                             |
| Jatrophone                                                 | 6.84E+15         | 8.22E+13   | 6.87E+11       | 9.44E+10 | 0.03969174                             |
| 7,8-Dihydroneopterin                                       | 1.02E+16         | 3.57E+12   | 2.99E+05       | 1.49E+04 | 0.01869177                             |
| 4-Chlorophenylacetoneitrile                                | 3.51E+13         | 8.77E+11   | 2.04E+10       | 4.64E+09 | 0.04069298                             |
| Halacrinat                                                 | 1.58E+17         | 9.88E+16   | 1.84E+04       | 8.79E+03 | 0.04467077                             |
| Cyclic 2,3-bisphospho-D-glycerate                          | 8.89E+12         | 7.46E+11   | 6.73E+09       | 7.67E+08 | 0.01290866                             |
| Lichenin                                                   | 4.82E+14         | 8.02E+10   | 2.93E+12       | 9.91E+11 | 0.0481721                              |
| AA861                                                      | 2.31E+15         | 1.97E+12   | 7.79E+07       | 2.79E+03 | 0.0097712                              |
| Orthophosphate                                             | 7.59E+14         | 1.22E+13   | 6.54E+05       | 1.18E+04 | 0.02772643                             |
| L-Arginine                                                 | 2.75E+16         | 7.76E+12   | 9.88E+12       | 3.28E+08 | 0.01925691                             |
| 5-Hydroxyindoleacetyl glycine                              | 4.79E+13         | 4.24E+10   | 3.86E+11       | 2.42E+08 | 0.02663235                             |
| (2S,3R)-2-[(2-aminophenyl)amino]-3-carboxy-3-oxopropanoate | 9.82E+15         | 4.32E+14   | 6.71E+09       | 8.98E+08 | 0.0322514                              |

| Upregulated in Geriatric | Mean (young) AUC | SD (young) | Mean (old) AUC | SD (old) | P-value (Benjamini-Hochberg corrected) |
|--------------------------|------------------|------------|----------------|----------|----------------------------------------|
| 3,4-Dichloroaniline      | 7.79E+14         | 8.66E+11   | 2.11E+17       | 1.01E+14 | 0.00330997                             |
| O-Phospho-L-homoserine   | 5.87E+11         | 2.95E+08   | 7.74E+16       | 2.39E+15 | 0.04016044                             |
